# Supplementary material for: Development and application of a transcriptional sensor for detection of heterologous acrylic acid production in E. coli
Source: PubMed Central journal article supplement (PMC6699081; doi:10.1186/s12934-019-1185-y), 2019-08-19
Supplement: 12934_2019_1185_MOESM2_ESM.pdf [file 12934_2019_1185_MOESM2_ESM.pdf]

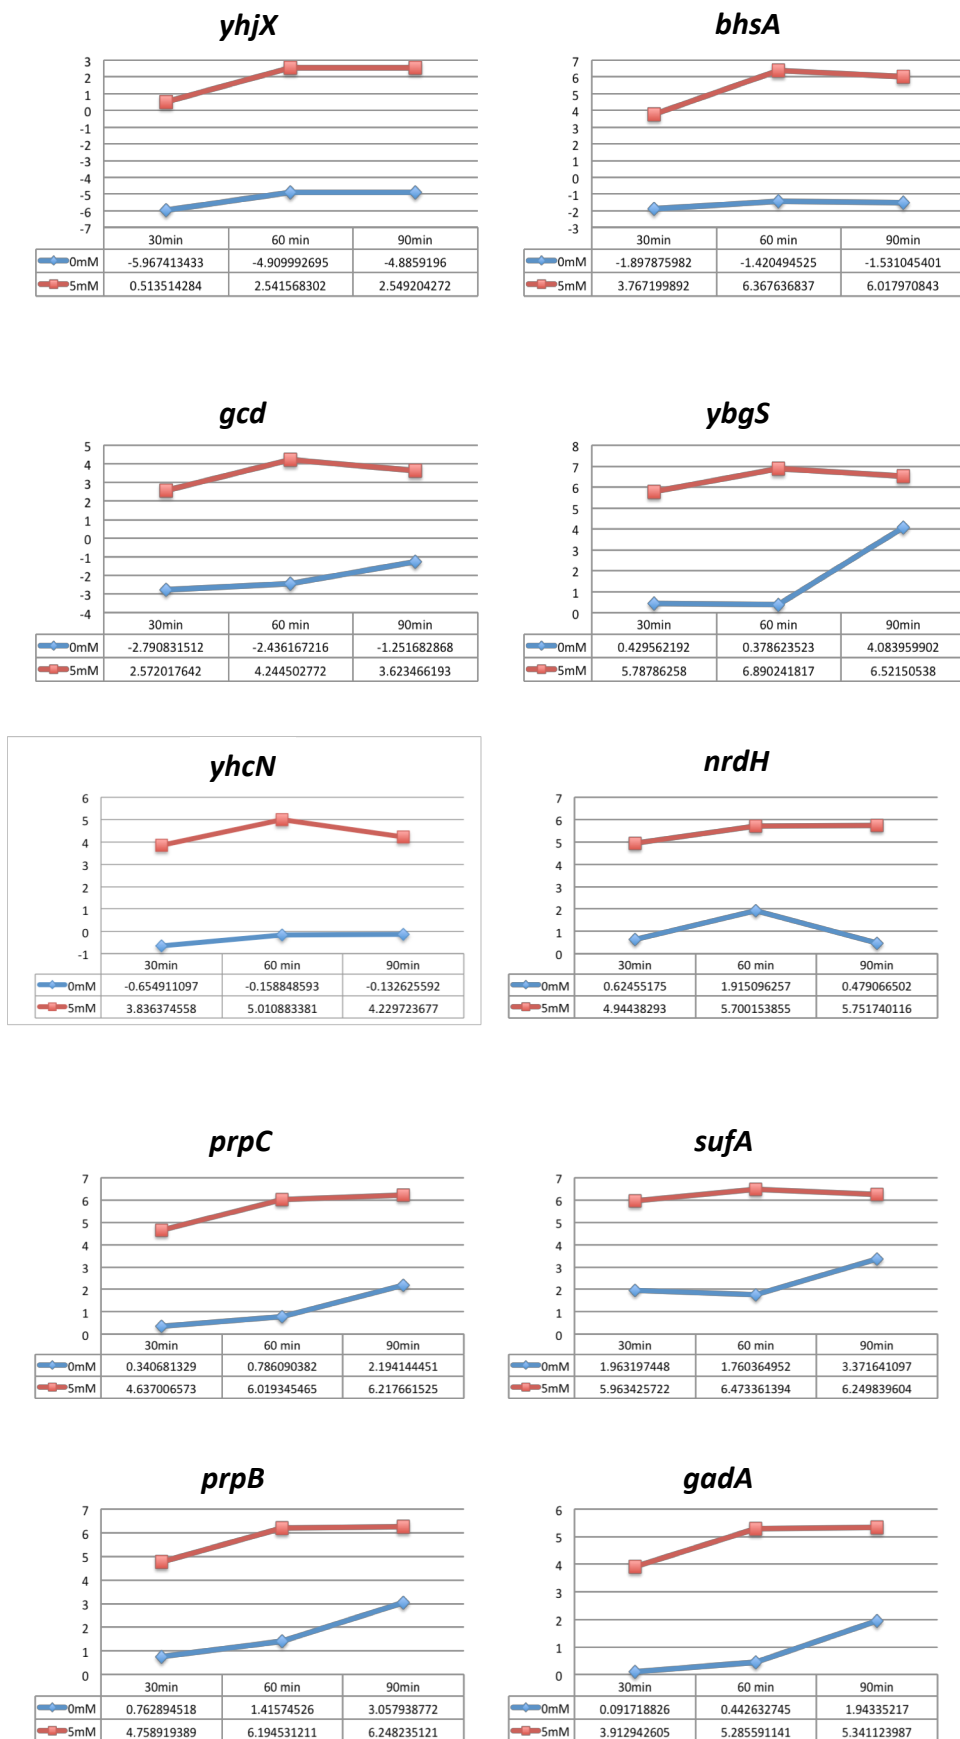

Fig. S1

RNAseq data for the top 10 AA-responsive genes showing relative expression levels over indicated times in presence (red) or absence of AA (blue).

***yhjX***

CGTAACAGTCACAATTGAAACCATTAAATAACAATAGTTGTGGCGATAGTGGGTG  
CTAACTTACCAAATAATAAATTTGGTGAATAATTGTCGCGTCATTCATTCCTGAACT  
AAGGCATTTTCATTCCGTTCTGATGGCATTTCATGCCGTTTTTCCCCAGGCATAAAG  
TGCACTTCGTTATGTTGTCTGGCAGAGATTTTTCTTTTTATTACTGCAGGAATACT  
GCC

***bhsA***

GATGCCGTTGTACCTGGTGACTGTGAATGAAAGGTTATTATAAAAATAATCACCTC  
CGTTCACCAGTCCAGATCCCATAAAAATAATTGCTTTCTATTTAACTGAAATTTAAA  
GATTTTTAAATTAATTAATGATTGTTATAAAAAATATCTTGTATGTGATCCAGATCAC  
ATCTATCATTTAGTTATCGATCGTTAAGTAATTGCTTGCGACGTCATTCATCTGCATA  
AGGCCACTATT

***yhcn***

TCTCTGCCCCGTCGTTTCTGACGGCGGGGAAAATGTTGCTTATCCCTCTCAACCC  
CCTGCTTTCCCTGCGATTAATTTAACGAATAGTGCCTTTACTGCGACATGTCATT  
CACACAATGAATACATAAGGTAAAAAAGCACATTATGCAAATTCATTATCTAATT  
GAAAAAACTAGAATTAACGATAAATAACCGTATTTTTAATTCTTTTTTGTATTAAAA  
TTCACATTTTTAACACTTAGTATCAACTGAAACAGTTAGCGCGGTATTAATTAGCTC  
AATAATTAGTGATACTTGATTTTGTGATATGGGTCACGAAACAAAGGCCAGCTA  
AAAGATTATGTCGAGGTAAAAATC

***prpB***

AGCGCACCGCAAAGTTAAGAAACCGAATATTGGGTTTAGTCTTGTTTCATAATTGT  
TGCAATGAAACGCGGTGAAACATTGCCTGAAACGTTAACTGAAACGCATATTTGC  
GGATTAGTTCATGACTTTATCTCTAACAAATTGAAATTAACATTTAATTTTATTAAG  
GCAATTGTGGCACACCCCTTGCTTTGTCTTTATCAACGCAAATAACAAGTTGATAA  
CAAAGGATGGGCT

***yhcn*  $\Delta$ 108**

CATTCACACAATGAATACATAAGGTAAAAAAGCACATTATGCAAATTCATTATCT  
AATTGAAAAAACTAGAATTAACGATAAATAACCGTATTTTTAATTCTTTTTTGTATTA  
AAATTCACATTTTTAACACTTAGTATCAACTGAAACAGTTAGCGCGGTATTAATTAG  
CTCAATAATTAGTGATACTTGATTTTGTGATATGGGTCACGAAACAAAGGCCAG  
CTAAAAGATTATGTCGAGGTAAAAATC

Fig. S2

Nucleotide sequences of promoter elements for the indicated genes used in this study.

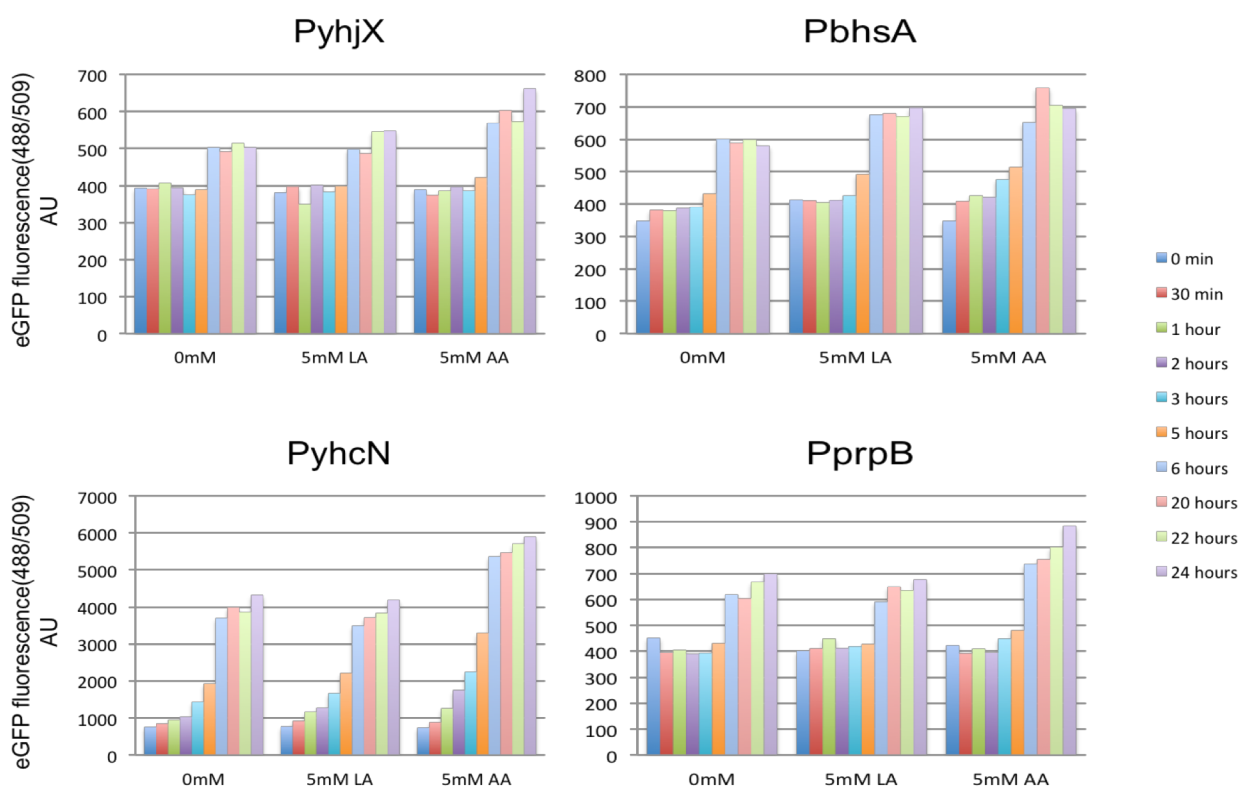

Fig. S3

Sensors ( $P_{yhjX}$ -eGFP,  $P_{bhsA}$ -eGFP,  $P_{yhcn}$ -eGFP and  $P_{prpB}$ -eGFP) expressed in *E. coli* cells treated with 5mM acrylic acid. eGFP fluorescence was observed over 24 hours.

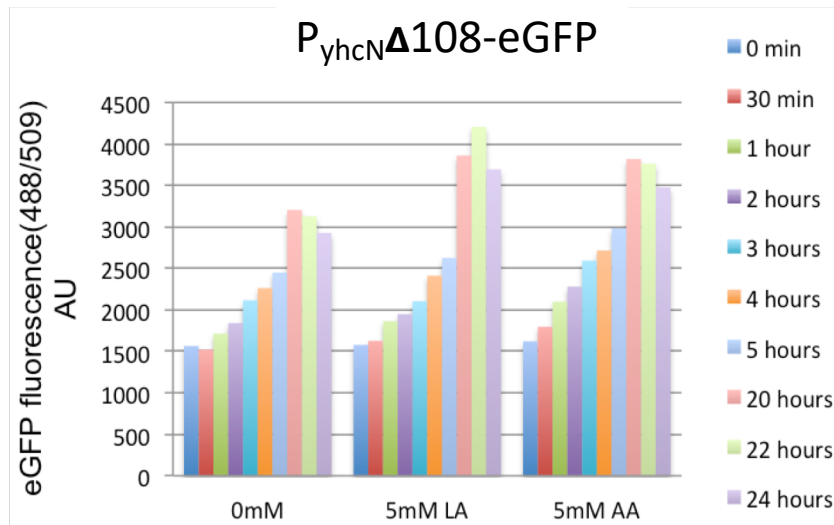

Fig. S4

The *yhcN* promoter in P<sub>yhcN</sub>-eGFP was truncated by removal of 108 bases at the 5' end to generate P<sub>yhcN</sub>Δ108-eGFP. Cells harbouring this construct were treated with 5mM acrylic acid (AA). Controls include untreated and 5mM lactic acid (LA) treated cells. eGFP fluorescence was measured over 24 hours.

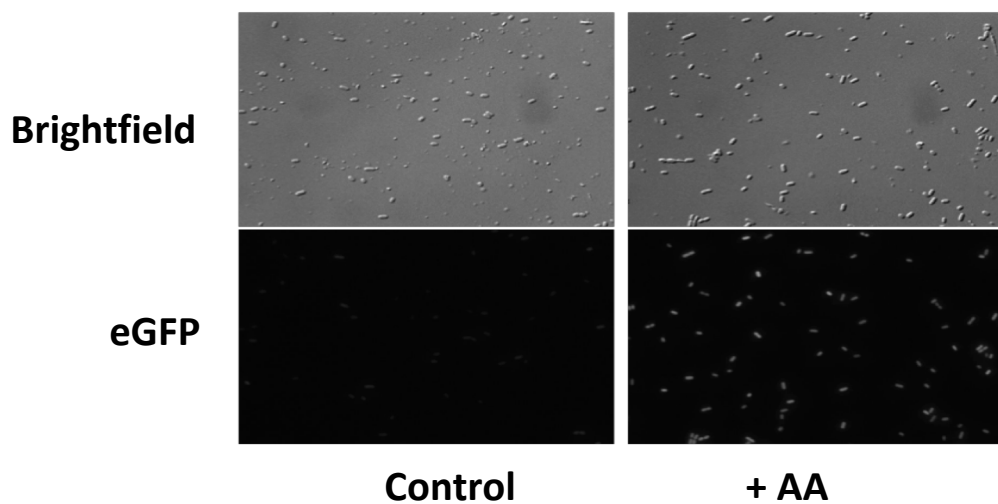

Fig. S5

*E.coli* cells stably integrated with the acrylic acid sensor shows eGFP fluorescence when exposed to acrylic acid (AA) (5mM) for 4 hours.

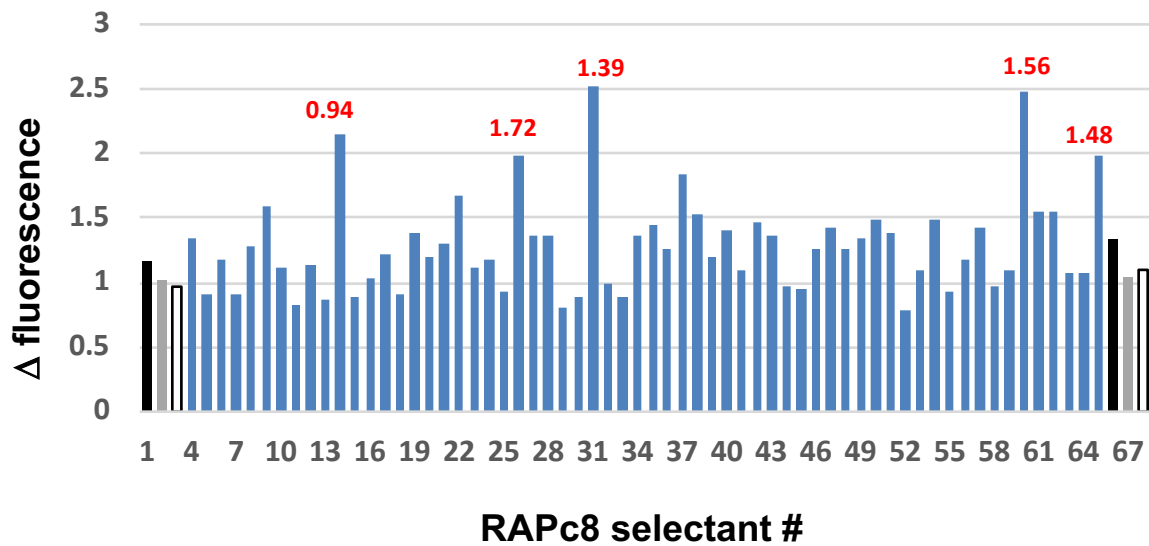

Fig. S6

Secondary assay indicating AA reporter gene activity for indicated RAPc8 selectants. Cells were treated with acrylamide (25mM) and fluorescence measured after 2 hours. Black, grey and white bars respectively indicate values for cells expressing WT RAPc8 and inactive E142D, E142L mutants. Values highlighted in red denote fold change in mean cell fluorescence over cells expressing WT enzyme determined by subsequent FACS analysis of top 5 selectants.
